# Supplementary material for: Development and Optimization of Novel Emulgel Loaded with Andrographolide-Rich Extract and Sesame Oil Using Quality by Design Approach: In Silico and In Vitro Cytotoxic Evaluation against A431 Cells
Source: MDPI journal article supplement (doi:10.3390/gels9070507), 2023-06-21
Supplement: s1 [file s1]

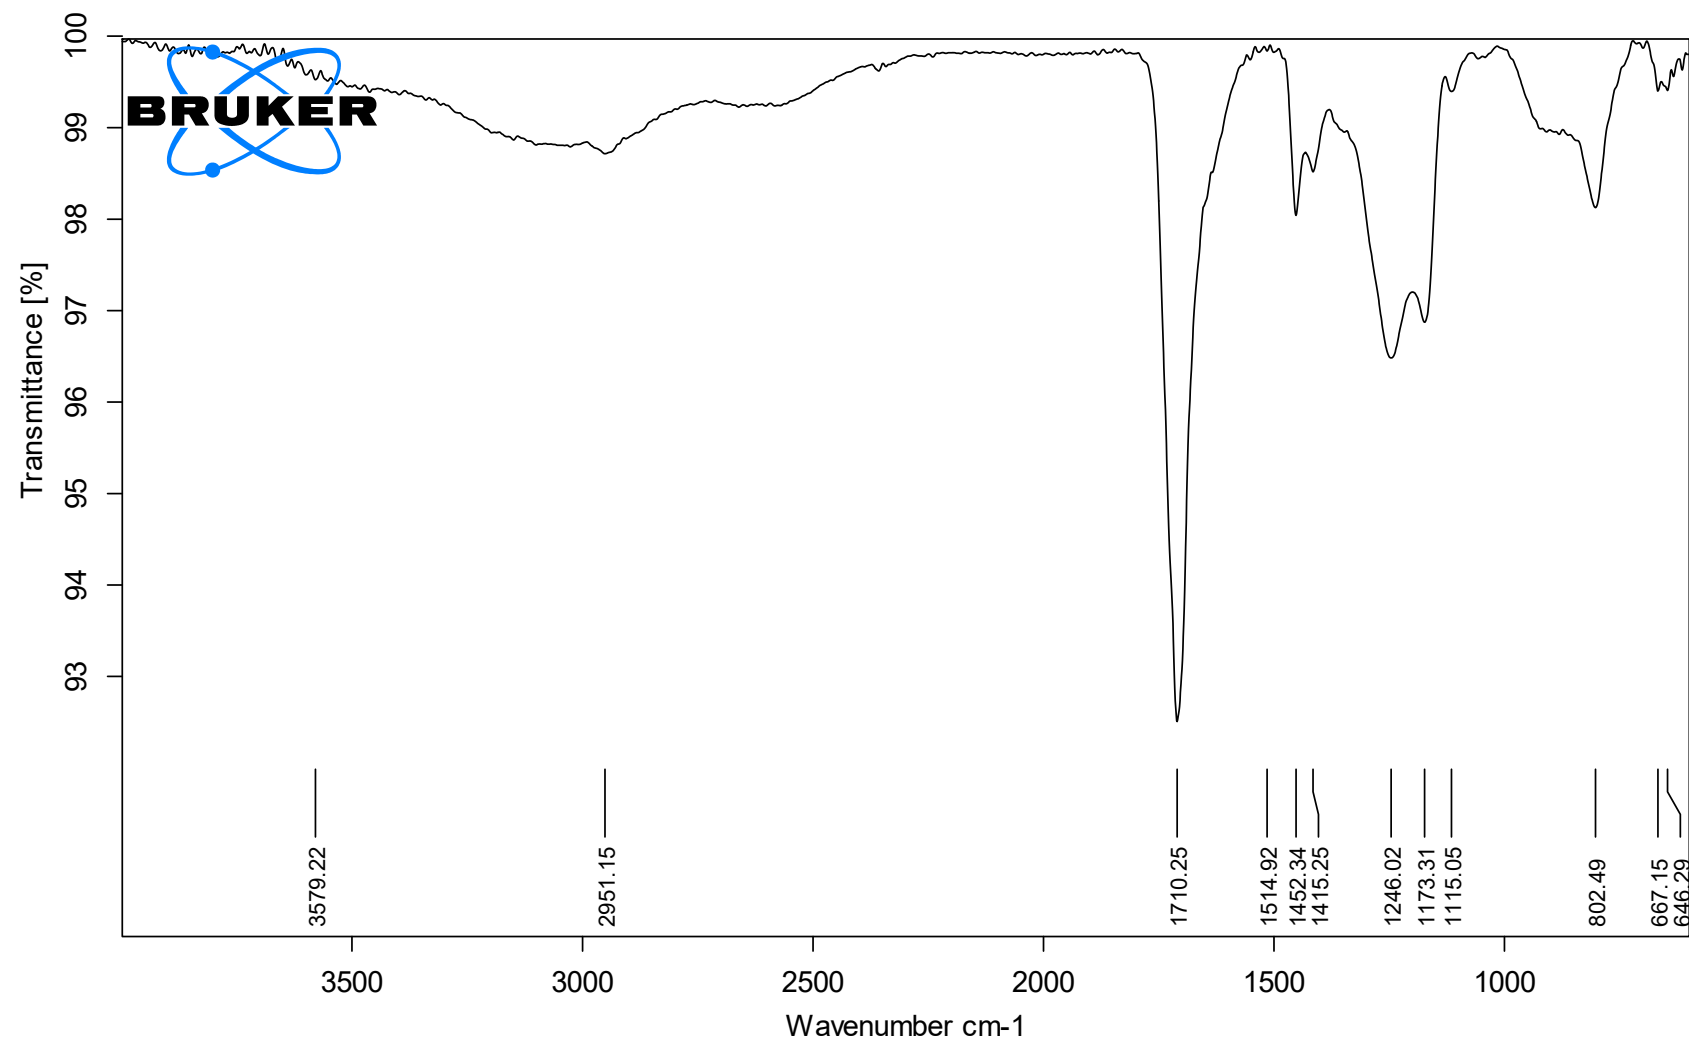

C:\Users\Public\Documents\Bruker\OPUS\_8.7.41\MEAS\Carbopol.0

Carbopol sample

01-03-2023

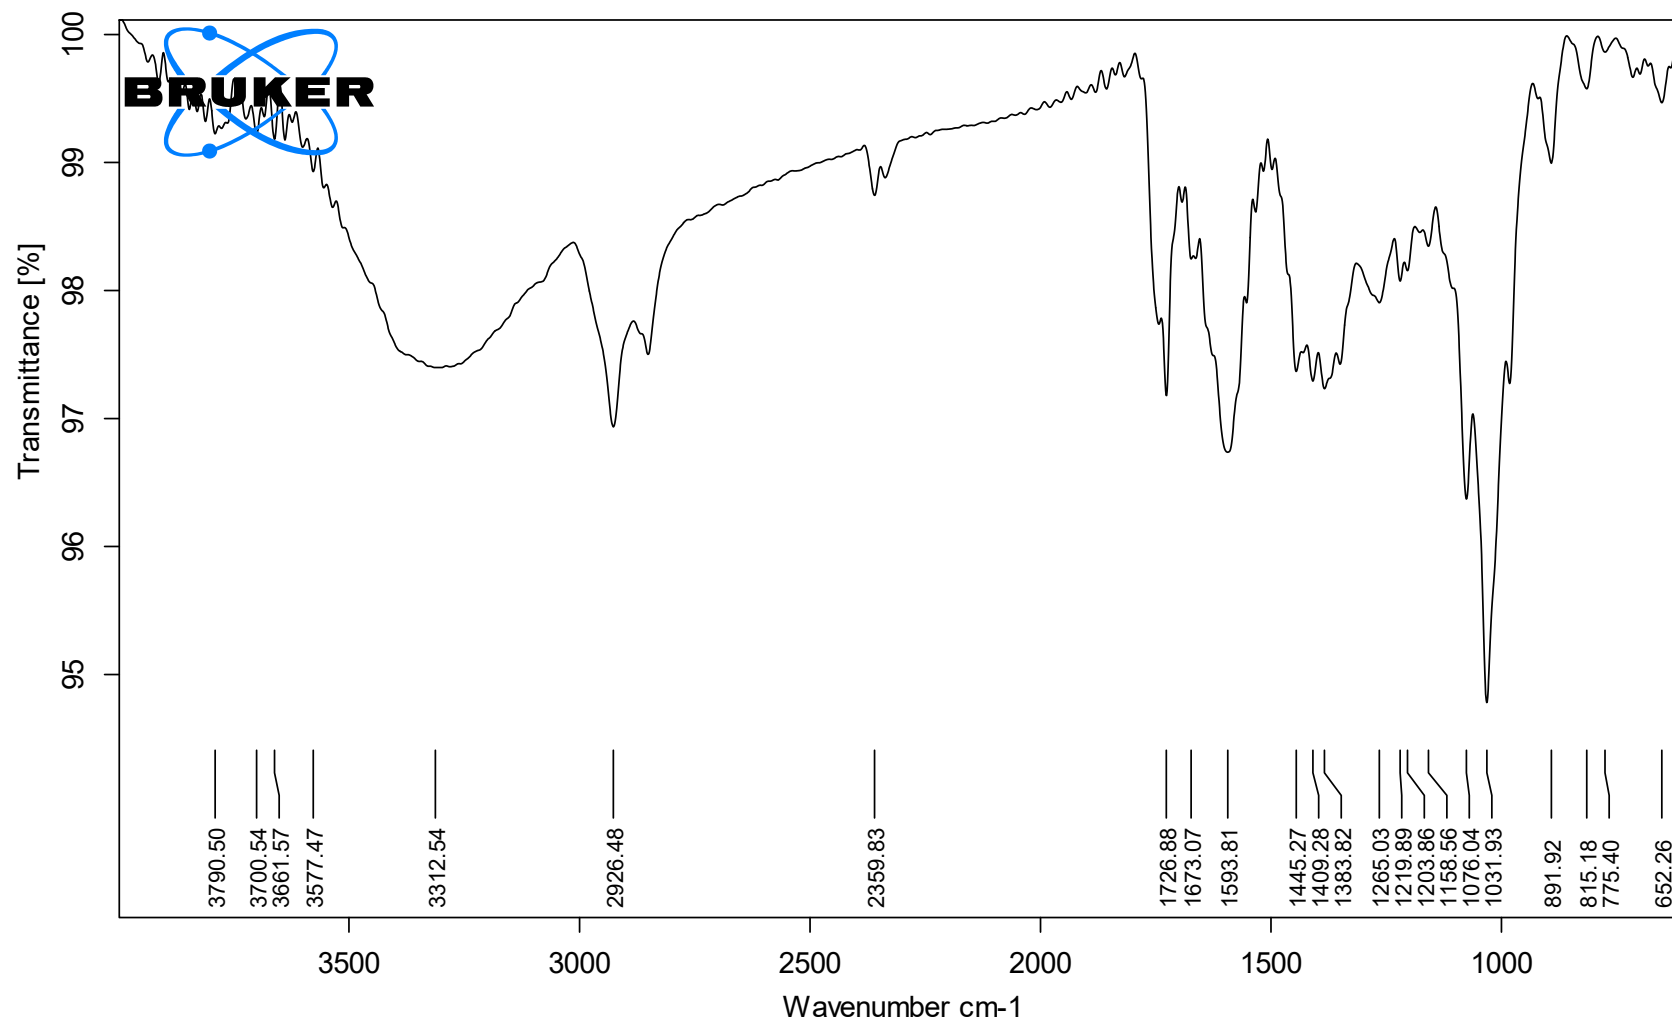

C:\Users\Public\Documents\Bruker\OPUS\_8.7.41\MEAS\Plant Extract.0

Plant Extract

sample

01-03-2023

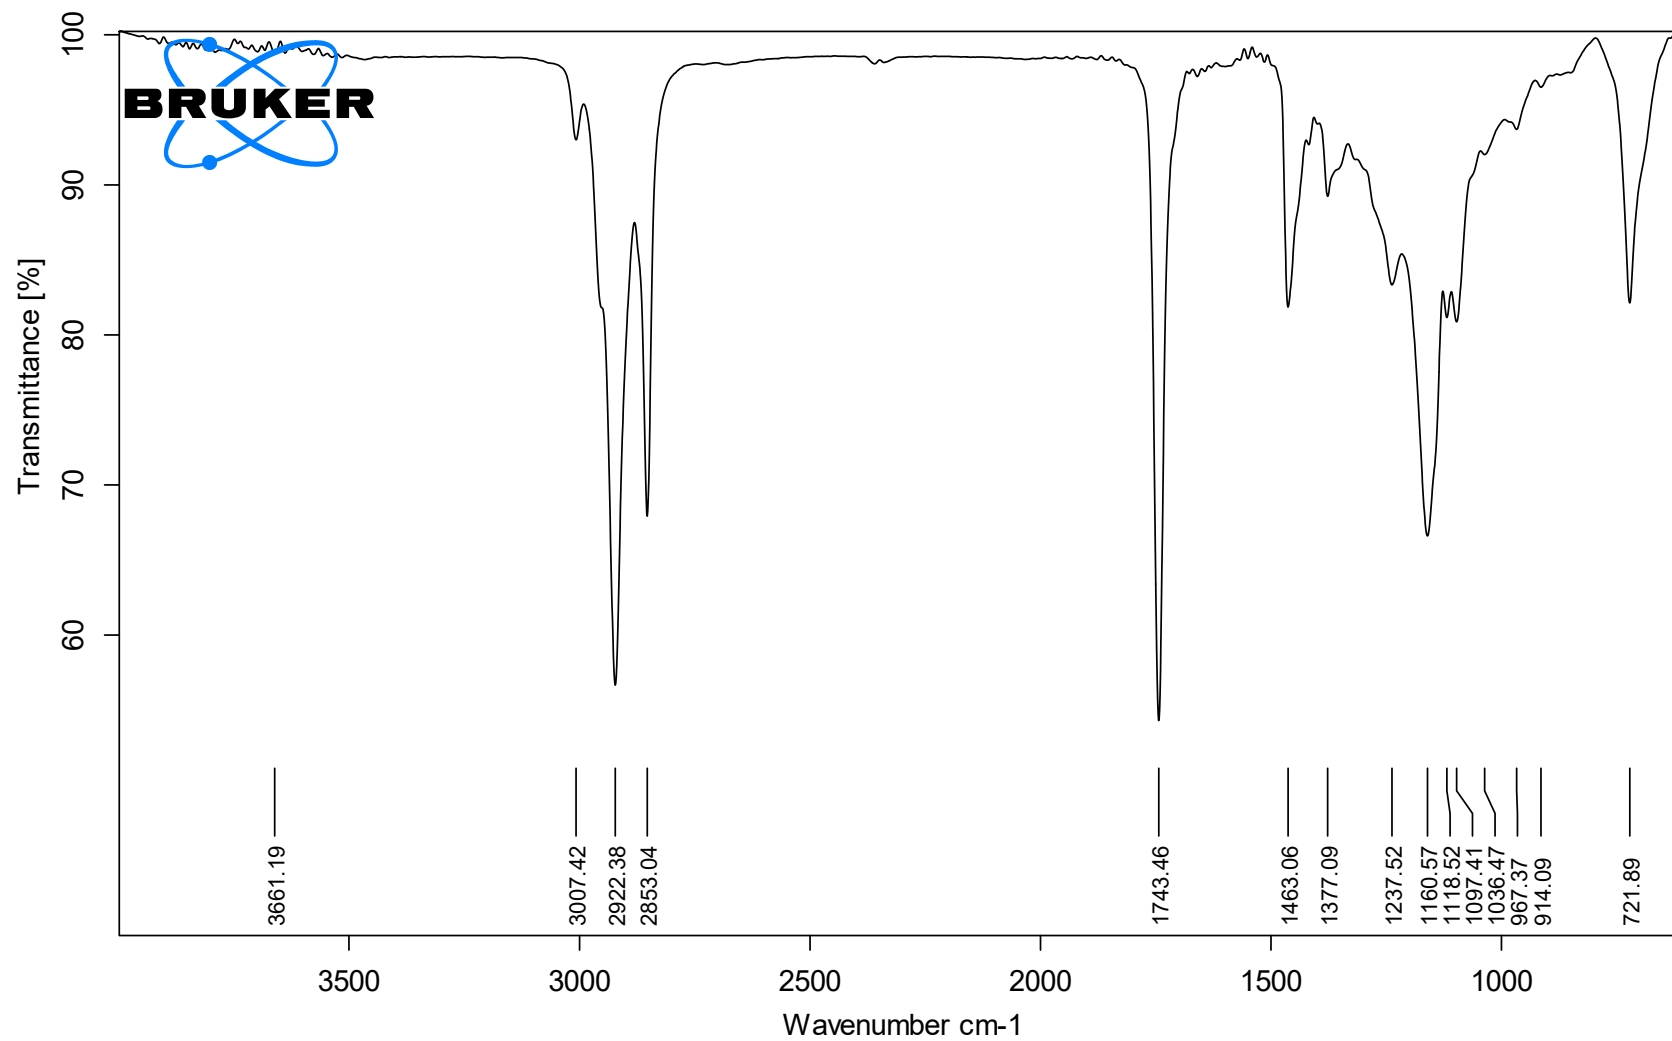

C:\Users\Public\Documents\Bruker\OPUS\_8.7.41\MEAS\Til oil.0

Til oil sample

01-03-2023

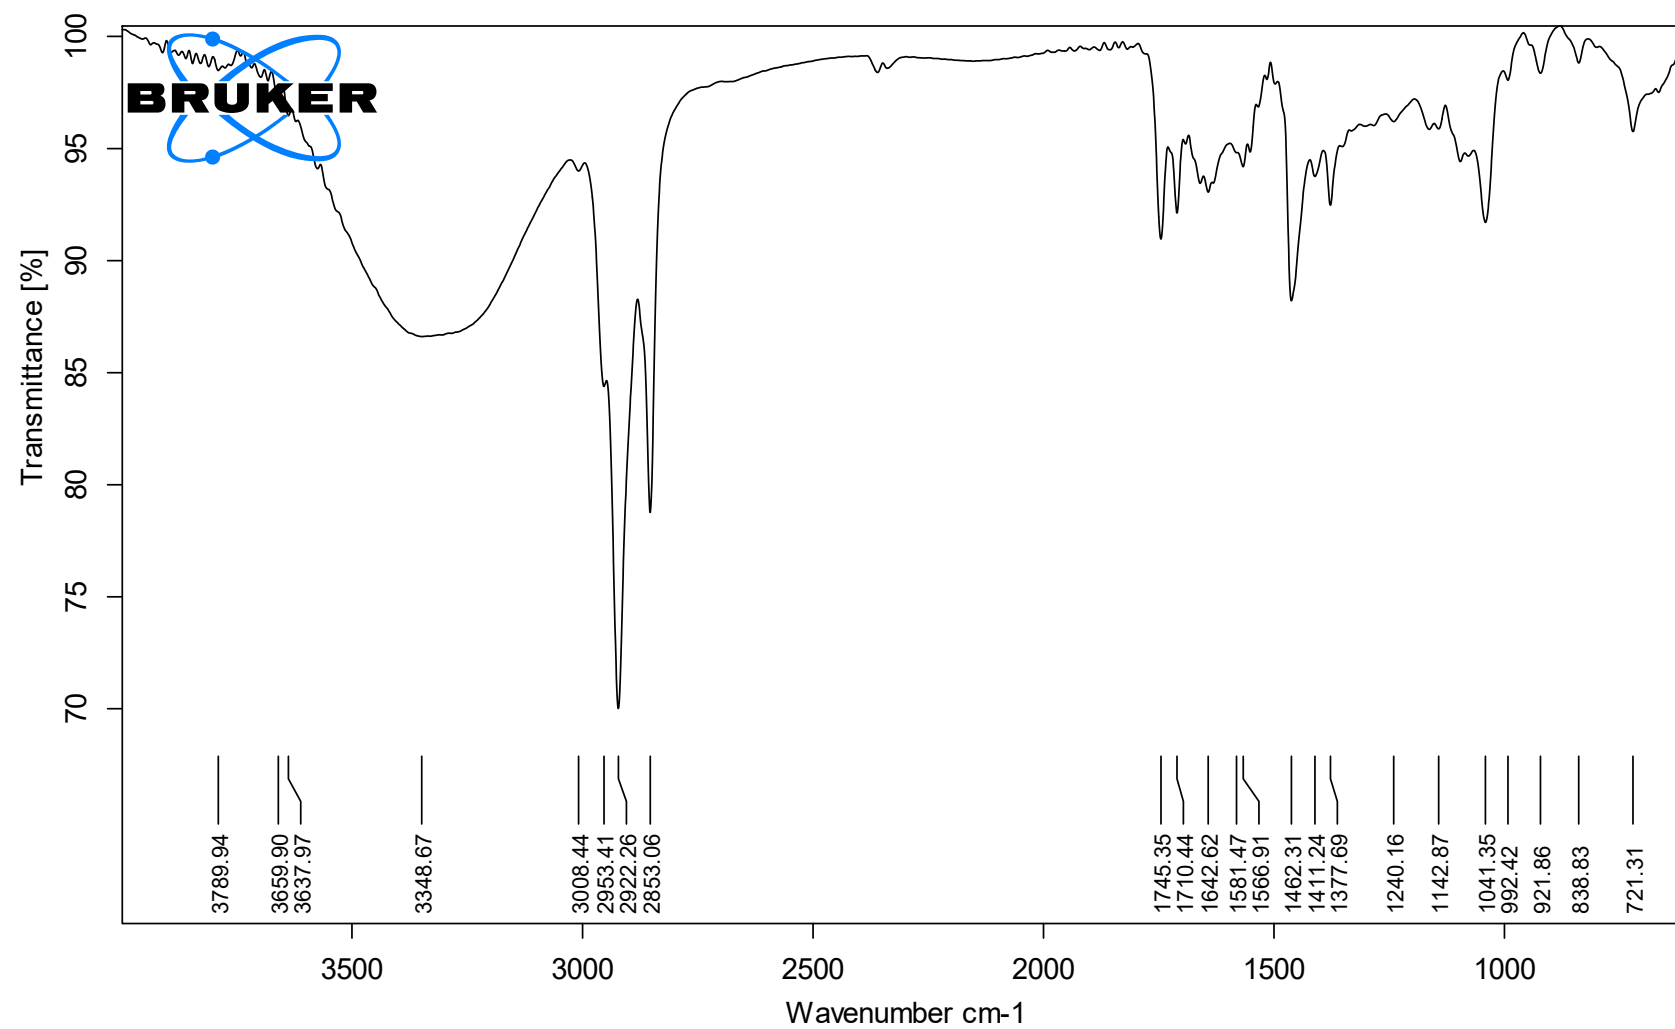

C:\Users\Public\Documents\Bruker\OPUS\_8.7.41\MEAS\TE 2.0

TE 2

sample

01-03-2023

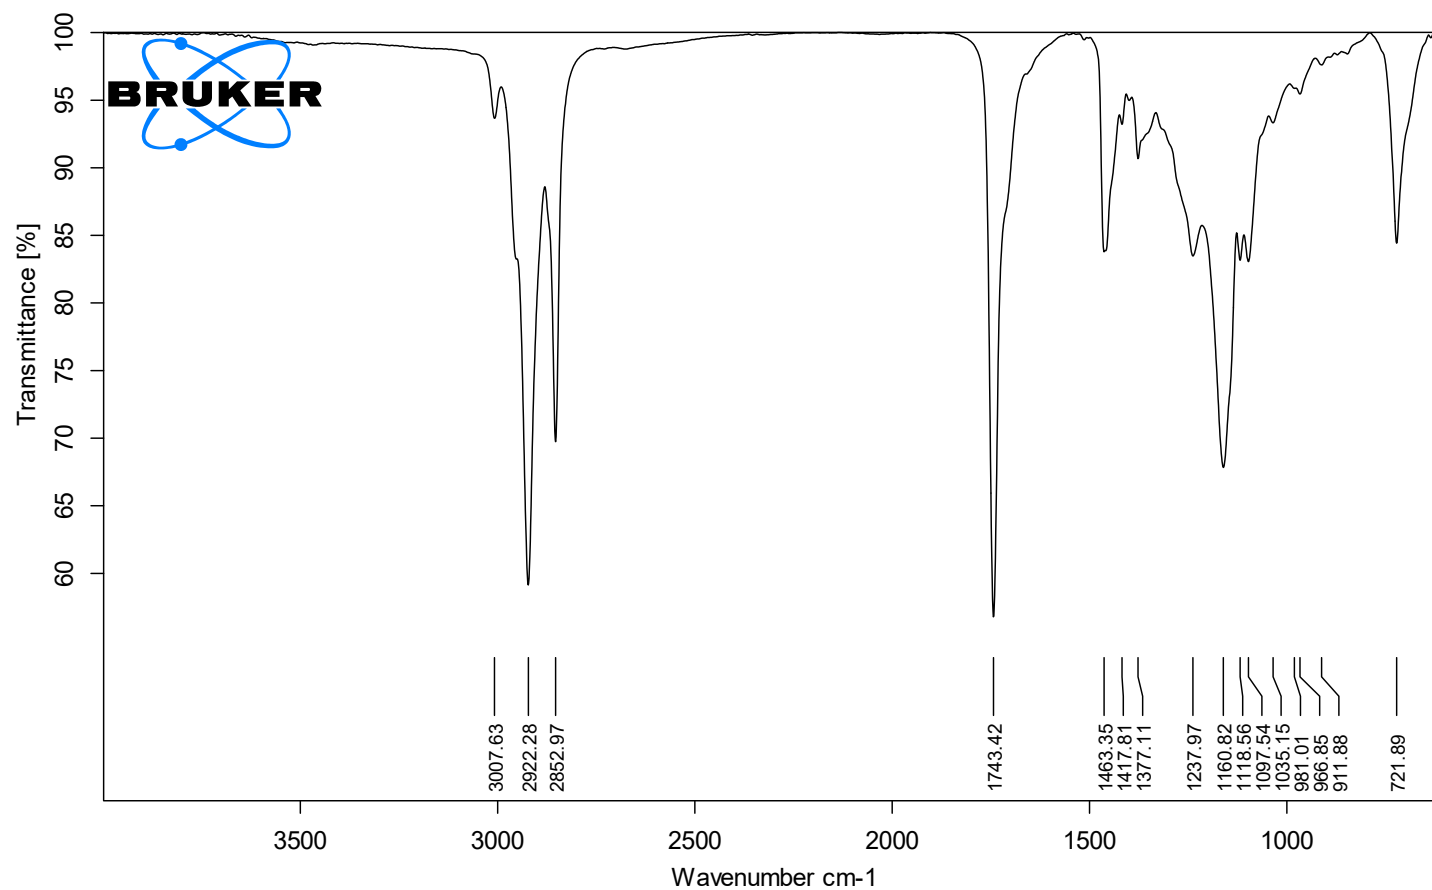

|                                                                      |                  |        |            |
|----------------------------------------------------------------------|------------------|--------|------------|
| C:\Users\Public\Documents\Bruker\OPUS_8.7.41\MEAS\Physical mixture.1 | Physical mixture | sample | 01-03-2023 |
|----------------------------------------------------------------------|------------------|--------|------------|

Figure S1. Compatibility studies of (A) Carbopol; (B) extract; (C) sesame oil; (D) physical mixture; (E) Emulgel

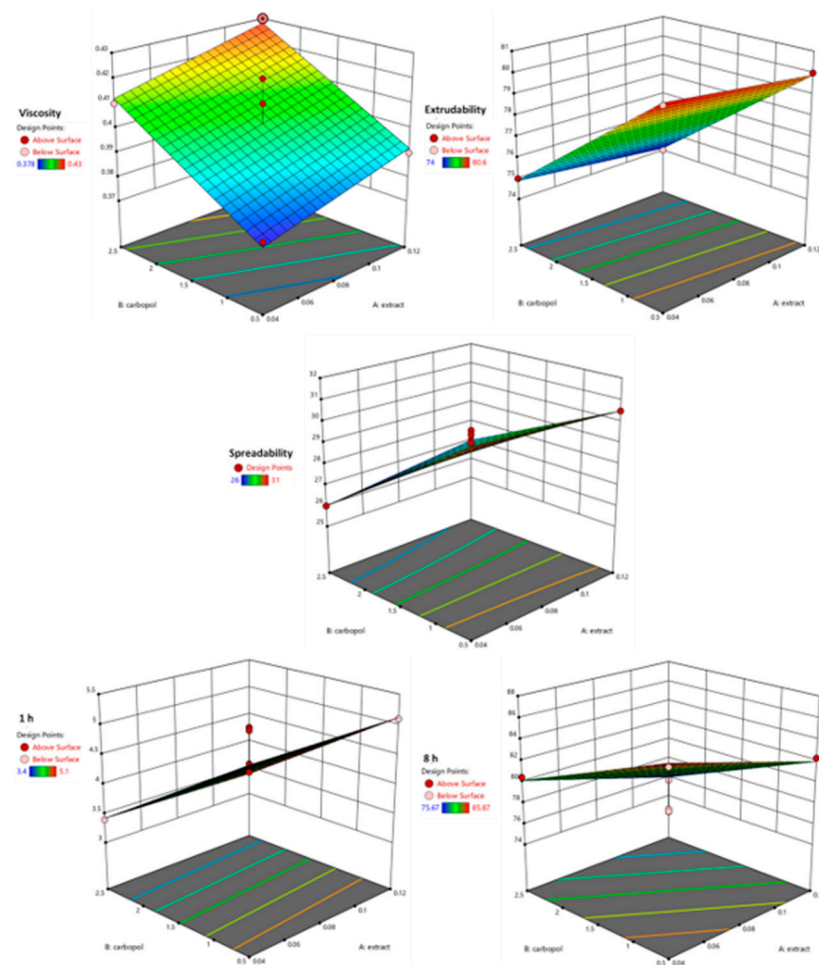

Figure S2. Response surface plot showing the effect of (a) Carbopol; (b) extract on responses—viscosity, extrudability, spreadability, and drug release (1 hr and 8 hrs).

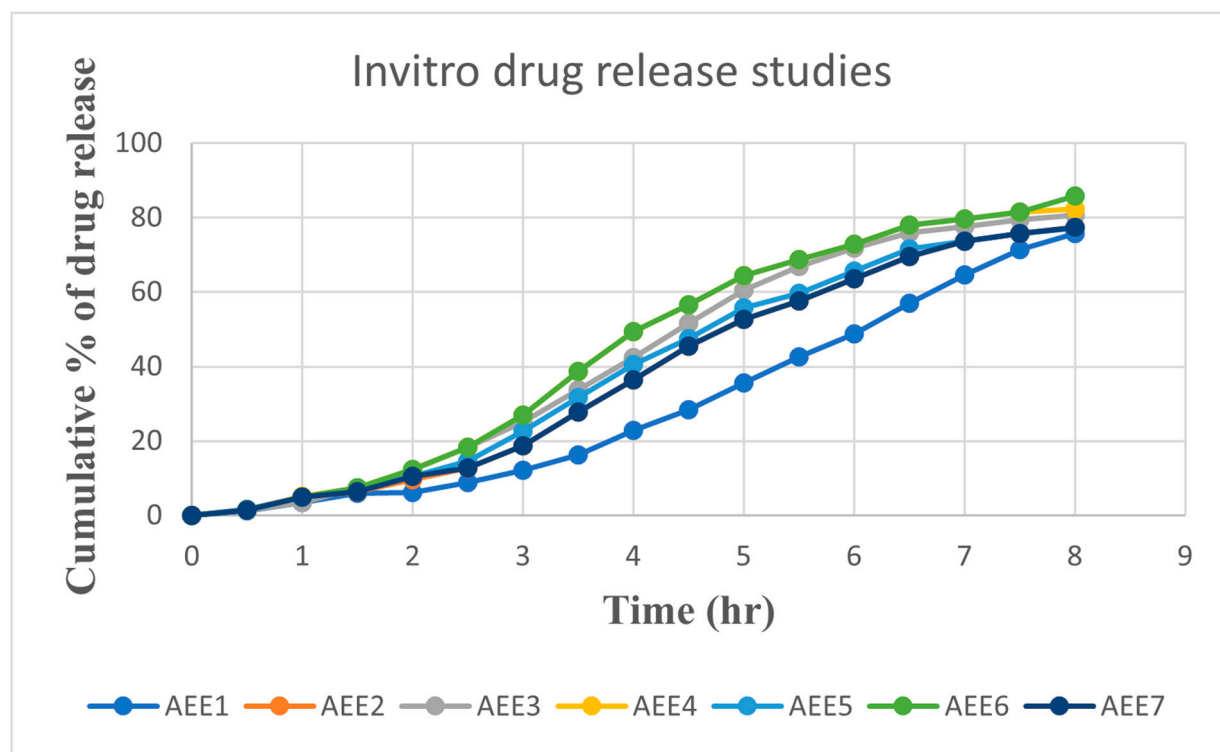

Figure S3. In vitro drug release profile of AEE1–AEE7.

## Results

|                                | Size (d.nm):         | % Intensity: | St Dev (d.n... |
|--------------------------------|----------------------|--------------|----------------|
| <b>Z-Average (d.nm):</b> 226.0 | <b>Peak 1:</b> 254.7 | 100.0        | 95.37          |
| <b>Pdl:</b> 0.157              | <b>Peak 2:</b> 0.000 | 0.0          | 0.000          |
| <b>Intercept:</b> 0.903        | <b>Peak 3:</b> 0.000 | 0.0          | 0.000          |
| <b>Result quality :</b> Good   |                      |              |                |

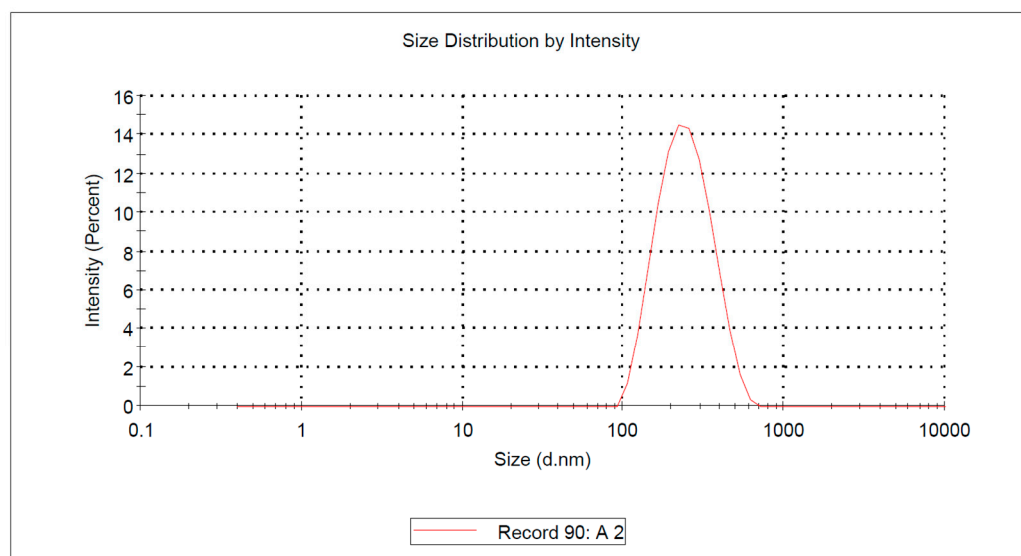

Figure S4. Particle size determination.



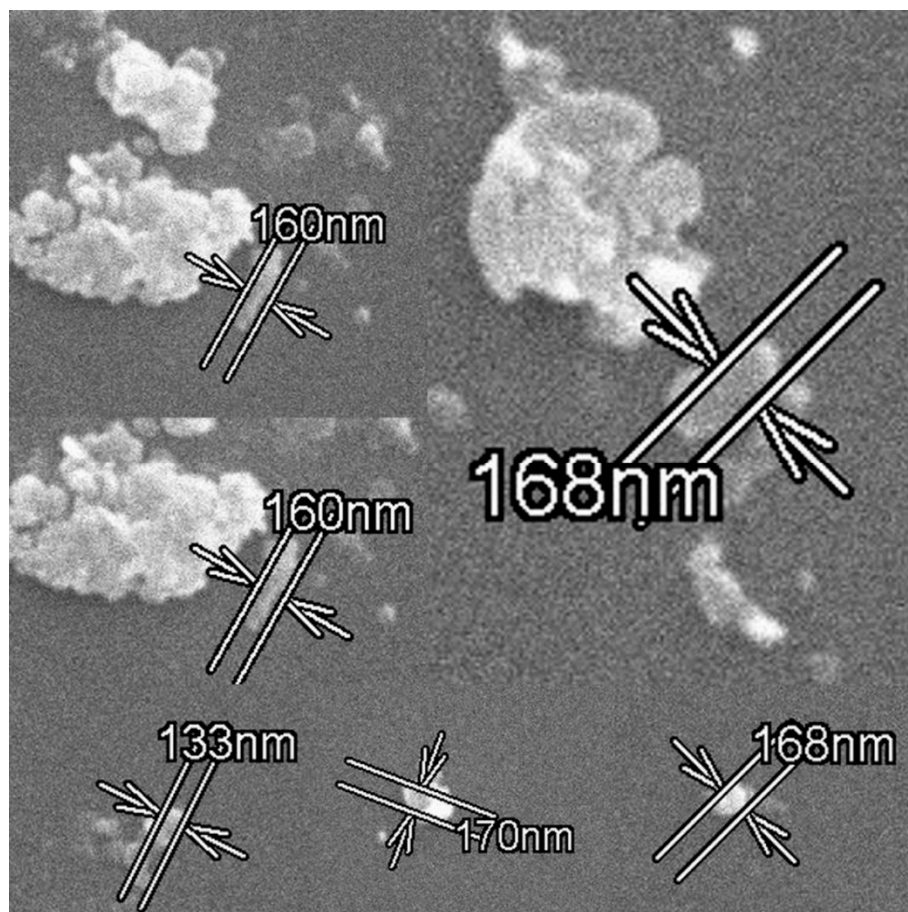

Figure S5. Surface morphology of the optimized emulgel.

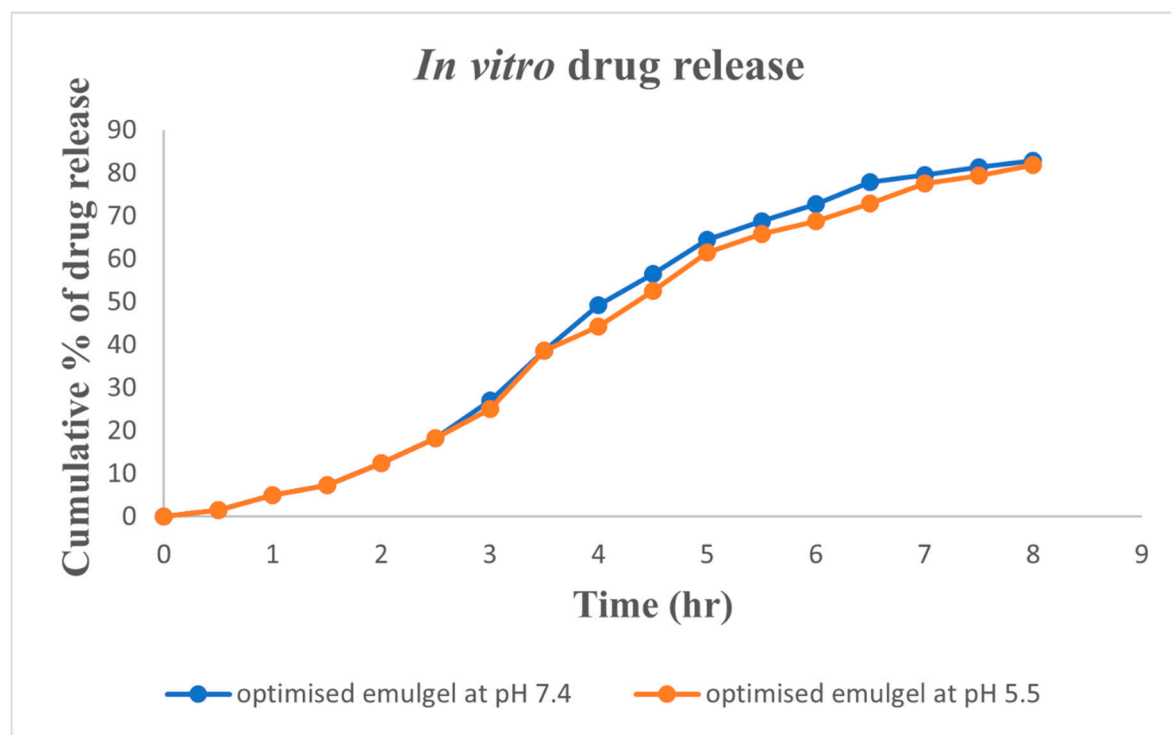

Figure S6. Drug release studies of optimized formulation
